# Supplementary material for: Myeloperoxidase inhibition may protect against endothelial glycocalyx shedding induced by COVID-19 plasma
Source: Research Square preprint supplement (doi:10.21203/rs.3.rs-1979903/v1), 2022-09-06
Supplement: Supplementary file 1 [file 4f1735ad88767c9453b9c7fe.docx]

**Supplementary Table 1. Correlations between myeloperoxidase and white blood cells count at enrolment**

| Acute phase myeloperoxidase levels vs (variables)Variables | Spearman, R | P | Acute phase myeloperoxidase activities vs (variables) | Spearman, R | P |
| --- | --- | --- | --- | --- | --- |
| Lymphocytes, n=24 | -0.34 | 0.09 |  | -0.07 | 0.72 |
| Monocytes, n=24 | 0.12 | 0.56 |  | -0.21 | 0.34 |
| Neutrophils, n=24 | **0.54** | **0.006** |  | 0.01 | 0.99 |
| Platelets, n=24 | 0.02 | 0.90 |  | -0.26 | 0.21 |
| White blood cells, n=24 | 0.39 | 0.054 |  | -0.05 | 0.83 |
| Neutrophils : lymphocytes, n=24 | **0.50** | **0.011** |  | 0.02 | 0.93 |

Rho determined by Spearman correlation coefficient, P <0.05 considered significant.

**Supplementary Table 2. Correlation between mediators associated with syndencan-1 and glypican-1 shedding.**

| Variables | Acute phase  (Syndecan-1) | | Convalescent phase  (Syndecan-1) | | Acute phase  (Glypican-1) | | Convalescent phase  (Glypican-1) | |
| --- | --- | --- | --- | --- | --- | --- | --- | --- |
|  | R | P  value | R | P  value | R | P  value | R | P  value |
| CRP, n=22 | **0.76** | **<0.0001** |  |  | 0.32 | 0.15 |  |  |
| MPO, n=25 | **0.42** | **0.03** | **0.39** | **0.05** | 0.30 | 0.15 | 0.08 | 0.69 |
| IFN-γ, n=25 | -0.25 | 0.23 | -0.05 | 0.83 | 0.22 | 0.29 | 0.13 | 0.53 |
| IL-10, n=25 | **-0.42** | **0.037** | -0.377 | 0.069 | 0.01 | 0.96 | -0.01 | 0.96 |
| IL-2, n =25 | 0.05 | 0.81 | -0.36 | 0.078 | -0.01 | 0.97 | **-0.50** | **0.012** |
| IL-6, n=25 | 0.26 | 0.20 | **0.44** | **0.028** | -0.04 | 0.82 | 0.18 | 0.40 |
| IP-10, n=25 | **0.67** | **0.0003** | 0.20 | 0.36 | **0.41** | **0.044** | -0.17 | 0.42 |
| MIP-1 α, n=25 | 0.05 | 0.81 | 0.13 | 0.54 | 0.32 | 0.11 | 0.22 | 0.30 |
| MIP-1 β, n=25 | 0.11 | 0.60 | 0.11 | 0.60 | 0.08 | 0.68 | 0.08 | 0.70 |
| TNF- α, n =25 | 0.01 | 0.95 | -0.20 | 0.35 | 0.08 | 0.67 | -0.38 | 0.063 |
| VEGF-α, n=25 | 0.08 | 0.68 | 0.09 | 0.67 | 0.12 | 0.56 | 0.11 | 0.59 |
| VEGF-β, n=25 | 0.27 | 0.18 | 0.14 | 0.53 | 0.15 | 0.47 | 0.27 | 0.20 |

Rho determined by Spearman correlation coefficient, P <0.05 considered significant. Abbreviations: CRP; C-reactive protein, MPO; myeloperoxidase, IFN; interferon, IL; interleukin, MIP; macrophage inflammatory protein, TNF; tumour necrosis factor, VEGF; vascular endothelial growth factor
